1 **Implementation and extended evaluation of the Euroimmun Anti-**  
2 **SARS-CoV-2 IgG assay and its contribution to the United Kingdom’s**  
3 **COVID-19 public health response.**

4  
5 Ashley David Otter<sup>1,2\*</sup>, Abbie Bown<sup>1</sup>, Silvia D’Arcangelo<sup>1,2</sup>, Daniel Bailey<sup>1</sup>, Amanda  
6 Semper<sup>3</sup>, Jacqueline Hewson<sup>2</sup>, Matthew Catton<sup>1</sup>, Prem Perumal<sup>1</sup>, Angela Sweed<sup>1</sup>,  
7 Jessica Jones<sup>3</sup>, Heli Harvala<sup>4</sup>, Abigail Lamikanra<sup>4</sup>, Maria Zambon<sup>5</sup>, Nick Andrews<sup>5</sup>,  
8 Heather Whitaker<sup>5</sup>, Ezra Linley<sup>6</sup>, Alexander J Mentzer<sup>7,8</sup>, Donal Skelly<sup>8,9,10</sup>, Julian C.  
9 Knight<sup>7</sup>, Paul Klenerman<sup>9</sup>, **PHE Porton Euroimmun testing group**<sup>11†</sup>, Gayatri  
10 Amirthalingam<sup>5</sup>, Stephen Taylor<sup>12</sup>, Cathy Rowe<sup>11,2</sup>, Richard Vipond<sup>1,3</sup>, Tim Brooks<sup>\*3</sup>.

11  
12 \* - corresponding authors: [ashley.otter@phe.gov.uk](mailto:ashley.otter@phe.gov.uk), [tim.brooks@phe.gov.uk](mailto:tim.brooks@phe.gov.uk)

13 † - Complete list of authors listed in the appendix 1

14  
15 1 – Diagnostic Support, National Infection Service, Public Health England, Porton, SP4 0JG  
16 2 – SARS-CoV-2 serosurveillance laboratory, National Infection Service, Public Health England, Porton, SP4 0JG  
17 3 – Rare and Imported Pathogens Laboratory, Public Health England, Porton, SP4 0JG  
18 4 – NHS Blood and Transfusion, Microbiology Services, Colindale, UK  
19 5 – Public Health England, Colindale, NW9 5EQ  
20 6 – Seroepidemiology Unit, Public Health England, Manchester, M13 9WZ  
21 7 – Wellcome Centre for Human Genetics, University of Oxford, Oxford, UK  
22 8 – Oxford University Hospitals NHS Foundation Trust, Oxford, UK  
23 9 – Peter Medawar Building for Pathogen Research, Nuffield Department of Medicine, University of Oxford, UK  
24 10 – Nuffield Department of Clinical Neurosciences, University of Oxford, Oxford, UK  
25 11 – National Infection Service, Public Health England, Porton, SP4 0JG  
26 12 – Pathogen Immunology, Public Health England, Porton, SP4 0JG

**NOTE: This preprint reports new research that has not been certified by peer review and should not be used to guide clinical practice.**

## 27 1. Abstract

28 In March 2020, the Rare and Imported Pathogens Laboratory at Public Health  
29 England, Porton Down, was tasked by the Department of Health and Social Care with  
30 setting up a national surveillance laboratory facility to study SARS-CoV-2 antibody  
31 responses and population-level sero-surveillance in response to the growing SARS-  
32 CoV-2 outbreak. In the following 12 months, the laboratory tested more than 160,000  
33 samples, facilitating a wide range of research and informing PHE, DHSC and UK  
34 government policy. Here we describe the implementation and use of the Euroimmun  
35 anti-SARS-CoV-2 IgG assay and provide an extended evaluation of its performance.  
36 We present a markedly improved sensitivity of 91.39% ( $\geq 14$  days 92.74%,  $\geq 21$  days  
37 93.59%) compared to our small-scale early study, and a specificity of 98.56%. In  
38 addition, we detail extended characteristics of the Euroimmun assay: intra- and inter-  
39 assay precision, correlation to neutralisation and assay linearity.

## 40 2. Introduction

41 Since its emergence in Wuhan, Hubei province, China, in late 2019, the novel severe  
42 acute respiratory syndrome coronavirus-2 (SARS-CoV-2) has caused a global  
43 pandemic of coronavirus 19 disease (COVID-19). A sobering milestone of three million  
44 COVID-19 associated deaths globally was reached on April 16 2021, with a cumulative  
45 total of more than 150 million SARS-CoV-2 infections reported worldwide<sup>1</sup>. The true  
46 scale of SARS-CoV-2 infections globally is likely to be much higher with a substantial  
47 number of cases of mild or asymptomatic disease being undetected.

48 The UK's first confirmed case of COVID-19 occurred in a person who had travelled  
49 from Hubei province to England on 23 January 2020 and became symptomatic three  
50 days later<sup>2</sup>. By the end of February, all four countries of the UK had recorded COVID-  
51 19 cases and community transmission was established<sup>3</sup>. Case numbers increased  
52 significantly in early March 2020, reaching a total of 6650 laboratory confirmed cases  
53 on 23 March<sup>4</sup> when a national lockdown was implemented. At that time,  
54 epidemiological modelling estimated that for every hospitalised COVID-19 case in the  
55 UK, there were a further 120-124 infected individuals undetected within the wider  
56 community<sup>4,5</sup>.

57 Individual laboratories began to investigate the use of in-house tests and it became  
58 apparent that the UK would benefit from a nationwide service to identify the prevalence  
59 of SARS-CoV-2 cases, including asymptomatic ones. Identification of these cases  
60 would be essential to inform government policy decisions; to further scientific  
61 understanding about immune response evolution, longevity and correlation to  
62 protection; and to estimate the true extent of the UK population's exposure to SARS-  
63 CoV-2. Additionally, such a service could address related questions such as the

64 performance of alternative SARS-CoV-2 serology assays. However, this work was  
65 complicated by logistical issues including the availability of relevant test kits that were  
66 in global demand, and the availability of relevant sample sets to validate new assays.  
67 Described here is the extended evaluation of the SARS-CoV-2 Euroimmun IgG assay,  
68 in addition to establishment of a sero-surveillance laboratory using this assay for over  
69 12 months.

### 70 3. Introduction of an anti-SARS-CoV-2 assay

71 The Rare and Imported Pathogens Laboratory (RIPL) at PHE Porton Down was tasked  
72 by the UK Government's Department for Health and Social Care (DHSC) with  
73 providing a SARS-CoV-2 serology service in support of a national serosurveillance  
74 programme. Testing on this scale would require the use of commercial CE-marked  
75 serology kits to guarantee the volumes of supply required, the possibility for  
76 automation and the necessary quality control of production batches, with our initial  
77 focus on an IgG specific assay. An initial market assessment identified only three  
78 companies with production kits available. Of these three kits, one targeted antibodies  
79 (IgG) against the SARS-CoV-2 spike protein S1 domain, one targeted nucleocapsid,  
80 and the third detected antibodies to an unspecified SARS-CoV-2 antigen. Whilst there  
81 is merit in having assays that target different antigens for the determination of  
82 differential antibody responses to SARS-CoV-2 infection, the use of spike was judged  
83 to be critical for virus entry to cells and therefore an assay detecting spike protein  
84 antibodies seemed the most attractive for initial use. Thus, the Euroimmun assay  
85 (targeting the S1 domain) was selected for the urgent operational requirement and to  
86 also provide an indication of the immune profile of subjects.

87 The laboratory had available existing Stratec Biomedical Gemini platforms (Launch  
88 Diagnostics, UK) capable of performing automated ELISAs. After initial ELISA  
89 optimisation on the Gemini platform, the first samples were tested to generate initial  
90 verification and evaluation data, using samples obtained from patients early in  
91 infection and with limited or incomplete clinical data through collaborators/hospitals.

92

93 On the 30<sup>th</sup> March 2020, PHE Porton Down went live with a COVID-19 serology  
94 service for the UK, with an initial capacity of ~800 samples a day. This was later  
95 expanded upon addition of two further Gemini platforms, doubling capacity to ~1,600  
96 samples a day. Just over 12 months later, as of 31<sup>st</sup> of April 2021, over 160,000  
97 samples have been analysed through this assay and workflow, providing answers to  
98 key questions about disease spread and the seroprevalence of SARS-CoV-2 infection,  
99 as well as informing outbreak management activities. To date, the Euroimmun assay  
100 has helped to deliver several significant studies for the UK population, covering  
101 population serosurveillance<sup>5</sup>; healthcare worker exposure<sup>6</sup>; selection of donors for  
102 convalescent plasma<sup>7-10</sup>; characterisation of reference standards; and research to  
103 determine the durability of the immune response<sup>6,11,12</sup>.

104

## 105 4. Methods

### 106 **Serum samples**

107 Early samples were sourced from collaborating colleagues at PHE Porton Down, PHE  
108 Sero-epidemiology Unit Manchester (SEU) and hospitals across England under  
109 Material Transfer Agreements (MTAs). These included residual diagnostic sera from  
110 SARS-CoV-2 PCR-confirmed samples from hospital in-patients (Guy's and St  
111 Thomas' Hospital, The Royal Free, Barnet Hospital and North Hampshire County  
112 Hospital, Basingstoke and John Radcliffe Hospital, Oxford), with data available on  
113 dates of collection versus onset of disease. Samples collected in Oxford were from  
114 individuals consented into 2 studies: Gastro-intestinal illness in Oxford: COVID  
115 substudy [Sheffield REC, reference: 16/YH/0247] and Sepsis Immunomics project  
116 [Oxford REC C, reference:19/SC/0296]) as described<sup>13</sup>. The large majority of samples  
117 were sourced from community cases of SARS-CoV-2 described within the FF100<sup>14</sup>  
118 and the PHE serology assay evaluation supporting information<sup>15</sup>. Of the Oxford patient  
119 cohort, 116 patients were classified as having mild disease, 15 severe, 13  
120 asymptomatic, 6 critical and 1 death.

121 To validate the Euroimmun assay (and future serology assays), pre-pandemic  
122 negative samples were also sourced to determine specificity. These were obtained  
123 from serum banks prior to the COVID-19 outbreak by the Royal College of General  
124 Practitioners (RCGP) for routine surveillance schemes and held by PHE SEU.

### 125 **Euroimmun anti-SARS-CoV-2 IgG assay**

126 All testing using the Euroimmun anti-SARS-CoV-2 IgG assay (EI 2606-9601 G,  
127 Euroimmun, Lübeck) was performed using an automated microplate processor  
128 (Stratec Gemini), which automates all aspect of the ELISA from sample dilution,

129 through to incubations, washing, reading and analysis, according to the  
130 manufacturer's instructions for use. Positive and negative kit controls provided by  
131 Euroimmun were included with every run, with commercial positive and negative anti-  
132 SARS-CoV-2 controls used in parallel (ACCURUN® Anti-SARS-CoV-2 Controls Kit -  
133 Series 1000; SeraCare, Gaithersburg) for additional internal quality control. Control  
134 values were tracked using a Levy-Jennings plot with Westgard rules applied.

135 The assay is semi-quantitative, with results expressed as a ratio (index) of the  
136 extinction (optical density) of the patient sample (or control) over the extinction of the  
137 calibrator. Interpretation of samples were defined according to the manufacturer, with  
138 an index value of  $<0.8$  defined as negative,  $>0.8$  to  $1.1$  defined as  
139 indeterminate/borderline and  $\geq 1.1$  interpreted as positive.

#### 140 **Linearity and assay variation**

141 To determine the assay linearity, five high titre serum samples were pooled, with two-  
142 fold dilutions generated, and each dilution was run in replicates of five. Similarly, the  
143 NIBSC Anti-SARS-CoV-2 Antibody Diagnostic Calibrant (20/162, NIBSC, Potters Bar)  
144 was run in triplicate across 1:5, 1:10, 1:20, 1:50 and 1:100 dilutions. Results from both  
145 the pool and NIBSC calibrant were used to determine the linearity of the Euroimmun  
146 assay.

147 The pooled serum samples were additionally used to determine the intra- and inter-  
148 assay variation, with five replicates measured each day across five days.

#### 149 **Microneutralisation against SARS-CoV-2**

150 On a panel of 138 convalescent blood donors that were  $>28$  days post-symptom onset,  
151 micro-neutralisation titres against SARS-CoV-2 were determined as previously  
152 described<sup>7</sup>, with neutralisation titres compared against Euroimmun ratio results.



## 153 5. Extended verification of the Euroimmun assay

154 In our original small-scale evaluation of the Euroimmun assay, reported in June 2020<sup>16</sup>  
155 and derived from samples obtained early in the outbreak, 100 PCR-positives samples  
156 where the time between sampling and symptom onset was known, were used to  
157 determine assay sensitivity, whilst 399 pre-pandemic negatives, 50 serum samples  
158 from 2015 seronegative for *Borrelia burgdorferi* and 50 confounder samples (VZV,  
159 EBV, CMV and rheumatoid positive) were used to determine specificity (left panel on  
160 **Figure 1**). Of the positive panel, 100 samples were initially used but this was later  
161 reduced to 93, as seven were found to not be PCR-confirmed. Of the positive samples,  
162 67/93 tested positive ( $\geq 1.1$  ratio) on the Euroimmun assay, giving an overall sensitivity  
163 of 72.0% (95%CI 61.78-80.86) (**Table 1**, **Figure 3**, PHE Original). When analysing  
164 only samples taken  $\geq 14$  days post-symptom onset, the sensitivity was 73.42% (95%CI  
165 62.28-82.73) and at  $\geq 21$  days, the sensitivity was 74.67% (95%CI 63.30-84.01)<sup>16</sup>.

166 Subsequent to our initial establishment of the serosurveillance service using the  
167 Euroimmun assay, further commercial immunoassay platforms and kits were  
168 evaluated at the request of the DHSC to inform decisions on the use of high-throughput  
169 assays by NHS laboratories for the detection of anti-SARS-CoV-2 antibodies in patient  
170 samples<sup>13,17</sup>. As part of this work, we extended our evaluation of the Euroimmun  
171 assay. Due to the limited samples and volumes available for the evaluation of high-  
172 throughput serology platforms, the panels differed slightly between our initial  
173 Euroimmun evaluation and subsequent other commercial assay evaluations  
174 performed by PHE Porton Down<sup>15</sup>. For the extended evaluation, an additional 592  
175 PCR-positive samples that were used for the different verifications of the higher-  
176 throughput platforms (including a head-to-head study<sup>13</sup>) were tested using the  
177 Euroimmun anti-SARS-CoV-2 IgG assay.

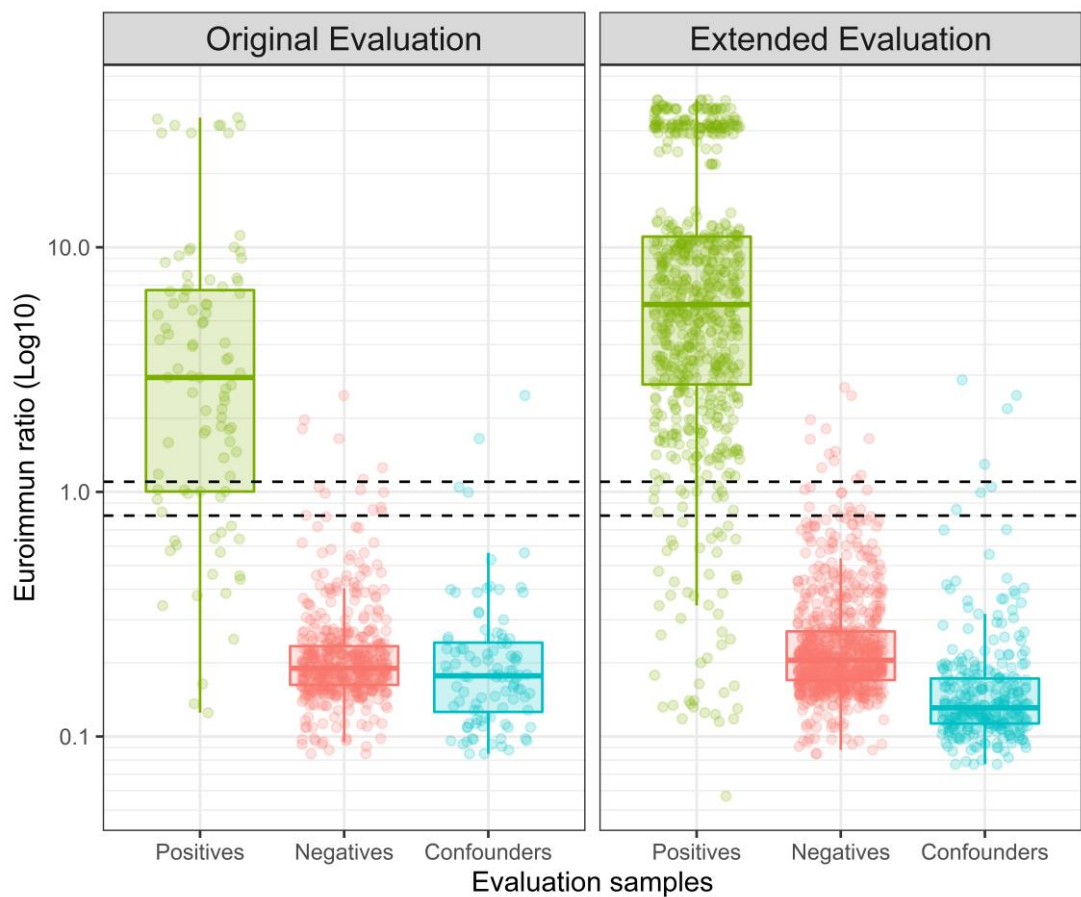

179 *Figure 1: Distribution of evaluation sample results split according to; **Left:** Original evaluation*  
180 *(n= 692), and **Right:** Extended evaluation (n=1,799). Dashed lines represent the*  
181 *indeterminate range of the Euroimmun assay (ratio or index or s/co  $\geq 0.8$  and  $< 1.1$ ).*

182

183 Using this larger panel, the overall sensitivity of the Euroimmun assay was found to  
184 be 91.39% (95% CI 89.03% to 93.38%), increasing to 92.74% when using samples  
185 with an onset of  $\geq 14$  days (95% CI 90.49% to 94.60%) and 93.59% when using  
186 samples with an onset of  $\geq 21$  days (95% CI 91.41% to 95.36%), markedly improved  
187 from the original evaluation (**Figure 1, Table 1, Figure 3**).

188 Additionally, the specificity panel was expanded from 499 to 1,114 samples: 303  
189 confounders (CMV, VZV, EBV and Rheumatoid positive samples), 711 pre-pandemic  
190 negatives and 100 Lyme disease negative samples from 2015. Using this panel, a  
191 specificity of 98.56% was calculated (95%CI 97.65-99.17%, n=1,114), similar to that  
192 from the original evaluation (specificity of 99.0%; 95%CI, 97.5-99.7%).

193 Receiver operating characteristic (ROC) analyses showed the highest area under  
194 curve (AUC) value was obtained (0.9902) when using samples from the extended  
195 evaluation panel with an interval of  $\geq 21$  days from onset of symptoms, whilst the  
196 original evaluation showed the lowest AUC (0.9584) (**Table 2, Figure 2**).

197 When examining the temporal distribution of the samples used for each of these  
198 evaluations, there was variation in the interval since disease/symptom onset (**Figure**  
199 **3**). Initial evaluation samples gave the highest frequency of reactive samples at 28  
200 days, whilst the extended evaluation showed the highest interval frequency spanning  
201 36-43 days after symptom onset. The majority of convalescent samples with intervals  
202 of  $< 21$  days tested positive (25 out of 53 samples).

203 This variation in interval distribution is reflected by the difference in the sensitivities  
204 seen between the two evaluations. **Figure 3** clearly shows that many of the initial PHE  
205 evaluation samples was limited in interval range, in part by sample availability, with  
206 samples typically taken between 14 to 35 days after symptom onset. This may account

207 for differences in sensitivities with some samples potentially taken too soon after onset  
208 of symptoms to identify any detectable antibody response. Conversely, many of the  
209 extended evaluation samples, by their nature, were taken from convalescent patients  
210 who had had sufficient interval post onset to generate a strong antibody response.

211 However, it should also be noted that no normalisation for sample demographics (for  
212 example differences in geographic location, gender, ethnicity or patient age-ranges)  
213 had been applied between datasets, so may have occurred and contributed to  
214 differences in sensitivity. Analysis of influence of demographic factors between sample  
215 sets is beyond the scope of this overview but may be reported in more detail in  
216 individual studies. None of our evaluation sets included longitudinal samples from the  
217 same patient.

218 **Table 1:** Sensitivity of the Euroimmun assay from the original PHE evaluation and the  
 219 extended evaluation described here. Samples giving an indeterminate value are included with  
 220 negative results.

| Panel                  | All samples |                 |                  | Samples >14 days |                 |                  | Samples >21 days |                 |                  |
|------------------------|-------------|-----------------|------------------|------------------|-----------------|------------------|------------------|-----------------|------------------|
|                        | n           | sensitivity (%) | 95% CI           | n                | sensitivity (%) | 95% CI           | n                | sensitivity (%) | 95% CI           |
| Original <sup>16</sup> | 93          | 72.00           | 61.78% to 80.86% | 83               | 73.42           | 62.28% to 82.73% | 77               | 74.67           | 63.30% to 84.01% |
| Extended               | 685         | 91.39           | 89.03% to 93.38% | 600              | 92.74           | 90.49% to 94.60% | 579              | 93.59           | 91.41% to 95.36% |

221

222 **Table 2:** ROC analysis values for each of the evaluation panels, with the extended evaluation  
 223 described here split by total and intervals of  $\geq 14$  and  $\geq 21$  days.

| Evaluation             | Panel          | Area   | P value | 95% CI           | Negatives (incl. confounders) | Positives |
|------------------------|----------------|--------|---------|------------------|-------------------------------|-----------|
| Original <sup>16</sup> | Total          | 0.9584 | <0.0001 | 0.9266 to 0.9902 | 499                           | 93        |
| Extended               | Total          | 0.9729 | <0.0001 | 0.9631 to 0.9827 | 1114                          | 685       |
|                        | $\geq 14$ days | 0.9886 | <0.0001 | 0.9826 to 0.9946 | 1114                          | 600       |
|                        | $\geq 21$ days | 0.9902 | <0.0001 | 0.9846 to 0.9958 | 1114                          | 579       |

224

225

226

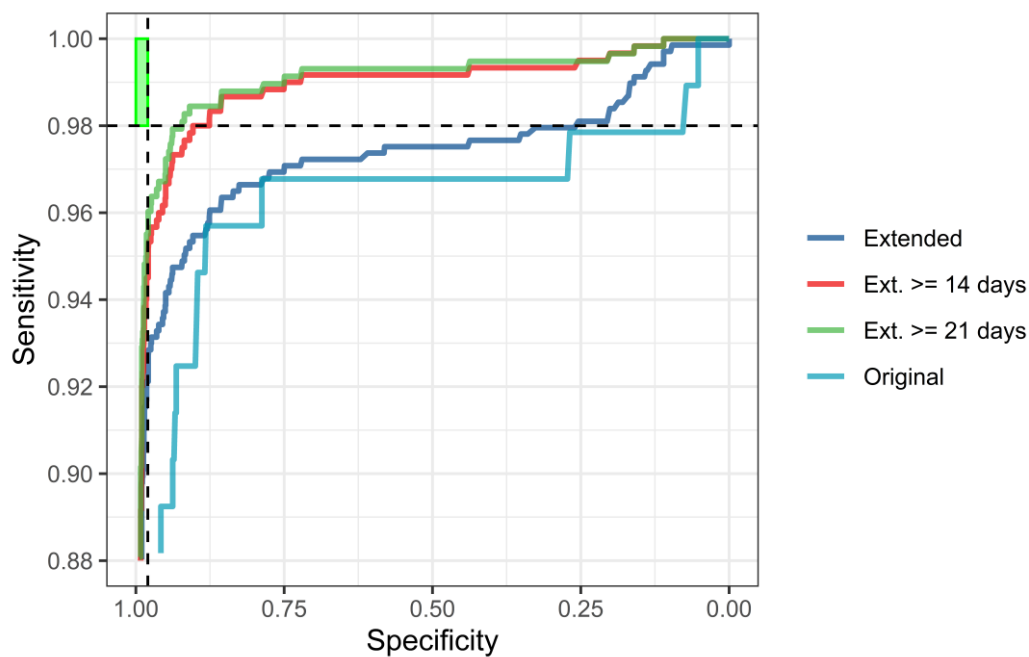

227

228 **Figure 2:** ROC curves for the Euroimmun assay. Curves are shown for the original (n=592)  
229 and extended evaluations (n=1,799), with the extended evaluation further split to show  
230 samples with intervals of  $\geq 14$  (n= 1,714) or  $\geq 21$  days (n= 1,693) after symptom onset. The  
231 green box indicates the MHRA Target Product Profile of serology assays (>98% sensitivity  
232 and specificity) at >20 days.

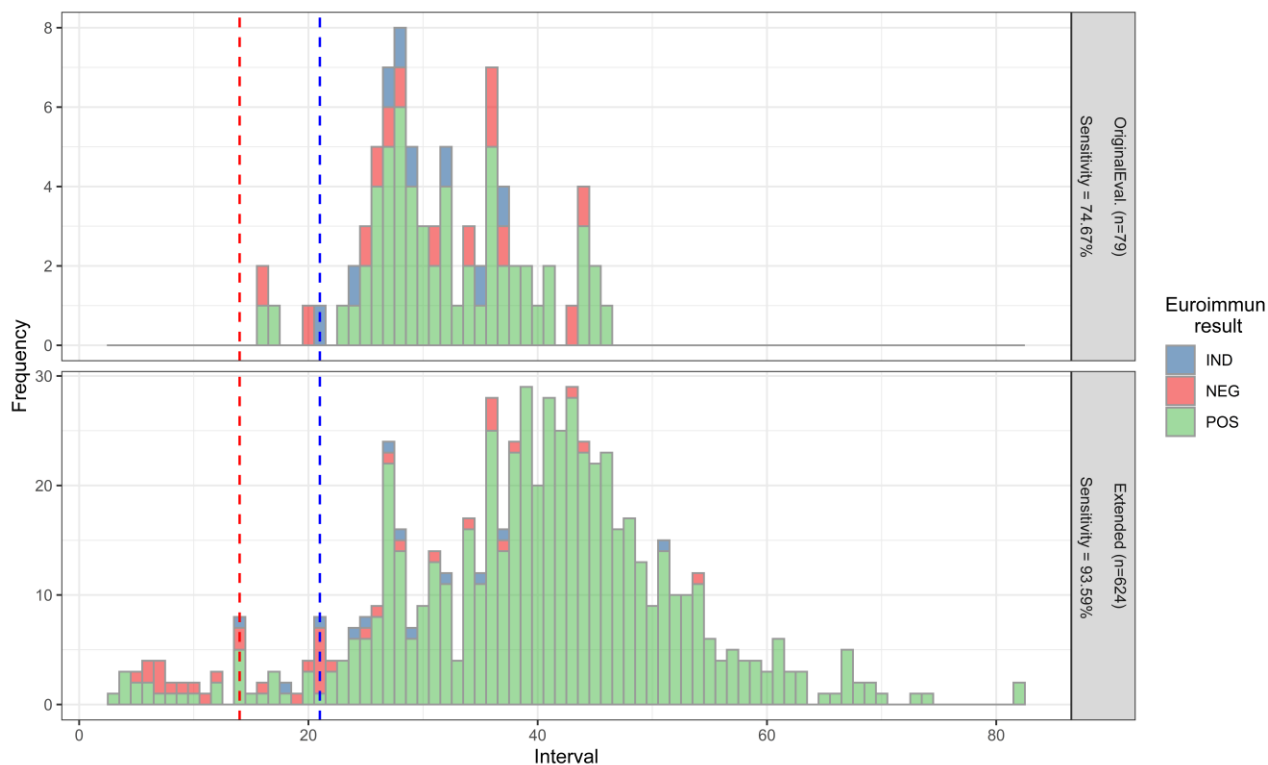

233

234 **Figure 3:** An overview of samples by interval distribution and evaluation panel, coloured by  
235 the Euroimmun assay result. Top: Original evaluation (n=79). Bottom: Extended evaluation  
236 (n=624). The sensitivity at an interval of  $\geq 21$  days is included in each graph, in line with the  
237 MHRA TPP. Red dashed line indicates 14-day interval, blue dashed line indicates 21-day  
238 interval.

239

## 240 6. Further assay characteristics

241 To determine the precision of the Euroimmun assay, five pooled patient samples were  
242 used in the absence of an international standard or calibrant at the time to generate a  
243 dilution series for linearity and to determine inter- and intra-assay variation, testing five  
244 replicates each over five days. The intra-assay and inter-assay variations were found  
245 to be <7% and <5% covariance (CV), respectively, indicating high precision when  
246 comparing samples across multiple days and replicate samples (Table S1).

247 Similarly, the dilution series was used to determine the linear range of the assay, with  
248 an  $R^2$  value of 0.985 (**Figure 4**). As more standards became available, the NIBSC  
249 Anti-SARS-CoV-2 Antibody Diagnostic Calibrant was serially diluted to generate  
250 additional linearity data, providing a similar  $R^2$  value of 0.955 (**Figure 4**). From the  
251 pooled patient sera and the NIBSC calibrant dilutions, the linear range of the assay  
252 was determined to lie between index values of 1 and 9. It is noted that the reader  
253 configuration on the Gemini platform resulted in strong positive samples that saturated  
254 the OD reader and the software assigns an over-read OD value (e.g. 9.999), which  
255 can result in an index value of between 25 – 38 depending on the calibrator OD  
256 reading. In routine use, the assay was used in a qualitative mode (e.g.  
257 positive/negative interpretation respectively) so saturating values were appropriately  
258 assigned as positive.

259 Serology assays that have a strong correlation to neutralising antibody titres are useful  
260 surrogates for live virus neutralisation assays, which require significant containment  
261 level 3 work. Of the 138 samples that were tested by both neutralisation and the  
262 Euroimmun assay, 129 were positive on both, whilst nine were only positive by  
263 Euroimmun (**Figure 5**), with seven of these samples giving an index result of 1 – 2



264 (close to the indeterminate range). There was a strong correlation between the  
265 Euroimmun results and the neutralisation titre, with an R of 0.83 ( $R^2 = 0.69$ ).

266

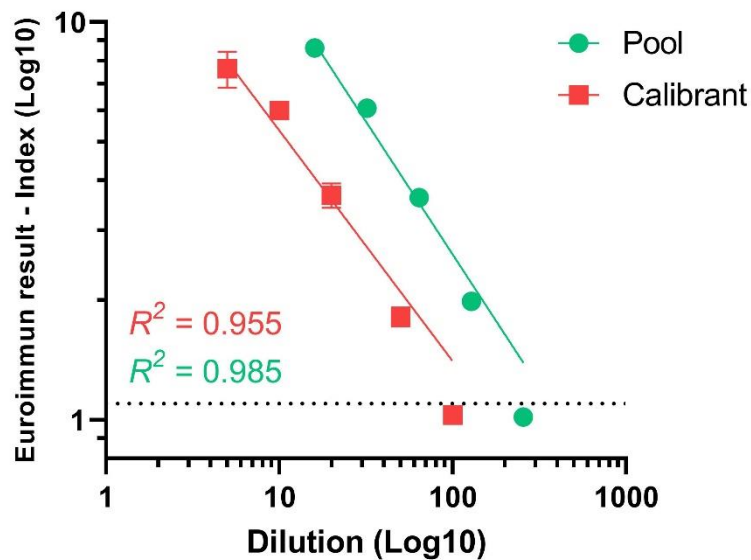

267

268 **Figure 4:** Dilutions and linear range of the Euroimmun assay, using pooled patient samples  
269 (pool; green) and the 20/162 NIBSC Anti-SARS-CoV-2 Antibody Diagnostic Calibrant  
270 (calibrant; red). Results >9 were removed due to saturated OD readings. Results with an index  
271 of  $\geq 1.1$  are considered positive whilst those  $< 0.8$  are considered negative, with the  
272 indeterminate range (0.8 to 1.1) shown with the dashed black line.

273

274

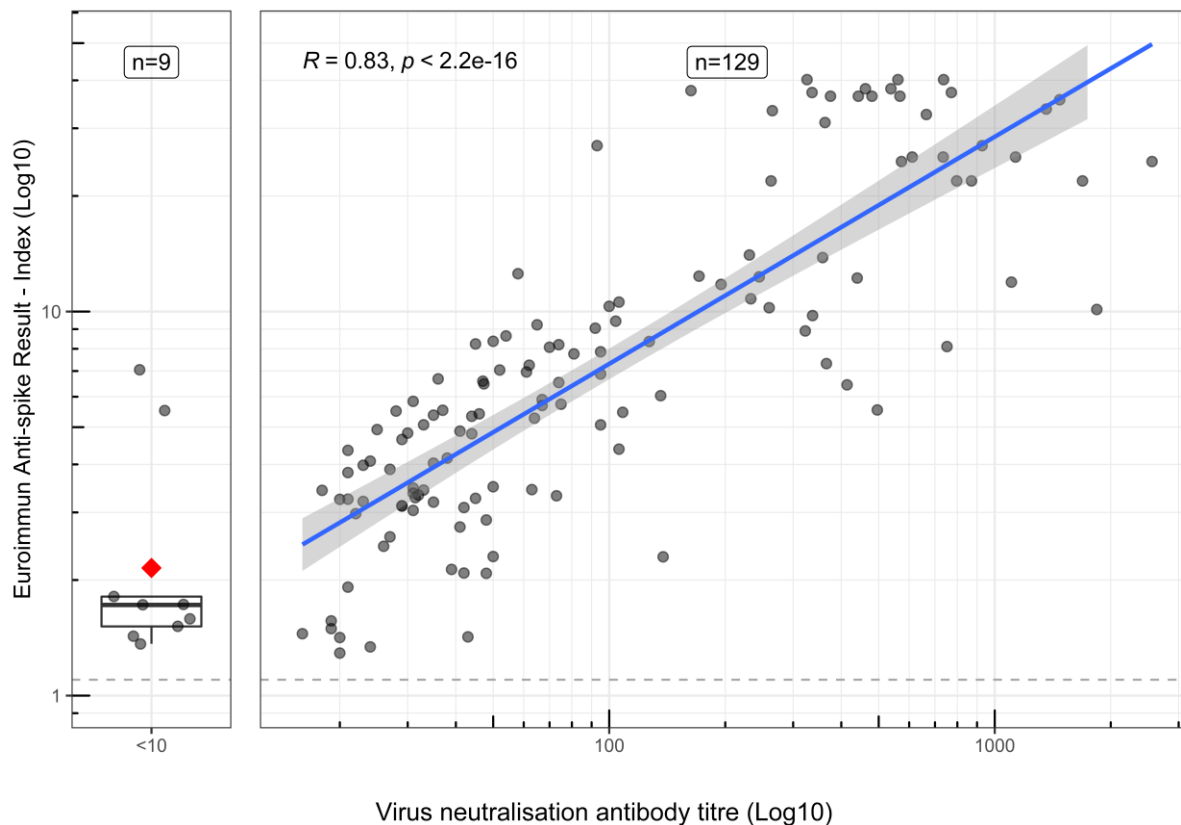

275

276 **Figure 5:** Comparison of convalescent blood donor serum samples tested using the  
277 Euroimmun anti-SARS-CoV-2 IgG assay (Log10 ratio value) and virus neutralisation antibody  
278 titre (Log10). Good correlation ( $R=0.83$ ,  $R^2=0.69$ ) was observed between neutralisation and  
279 the Euroimmun assay. Blue line indicates linear model, with 95% confidence interval (grey  
280 range). Dashed line indicates the positive cut-off value ( $\geq 1.1$  index), whilst the red square  
281 shows the mean of the samples negative by neutralisation, but positive by Euroimmun assay.

## 282 7. Use of the Euroimmun assay in the United Kingdom

283 A number of national and local projects with appropriate ethical approvals have been  
284 facilitated through this work and Figure 6 indicates the scope of Euroimmun testing  
285 performed by PHE Porton Down between March 2020 to April 2021. Descriptions of  
286 some of these projects are highlighted below although more comprehensive analysis  
287 is published elsewhere from the respective project groups.

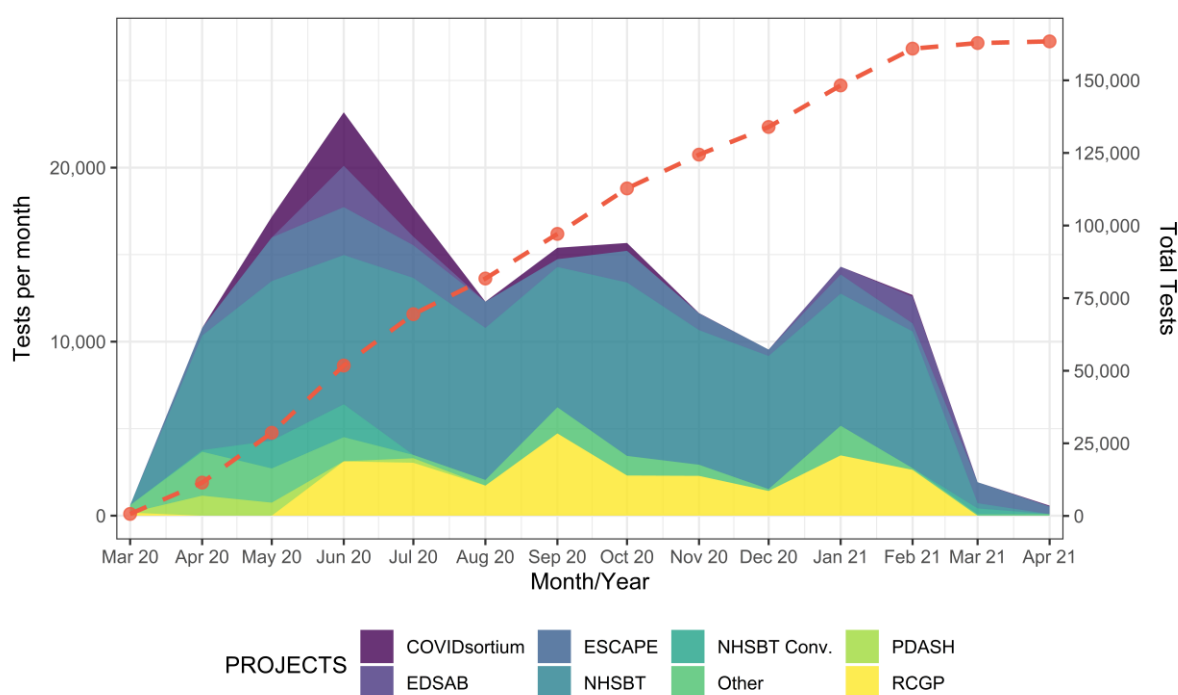

288

289 **Figure 6:** An overview of the number of samples tested using the Euroimmun assay at PHE  
290 Porton Down, with total tests (red-dashed line), spanning March 2020 to April 2021. Colours  
291 indicate different projects, as described in the text. Projects have since been moved to  
292 additional platforms as of March 2021.

293

294 As part of a UK serosurveillance scheme, anonymised residual blood donor samples  
295 from people aged 17-84 from different regions of England were sourced from the NHS  
296 Blood and Transplant (NHSBT) service to provide additional venous blood samples to  
297 determine COVID-19 seroprevalence by age and region. This data began prior to other

298 serosurveillance studies (for example, REACT, ONS) so provided PHE and external  
299 modelling groups with the only source of seroprevalence data for the UK at the time.

300 Approximately 10,000 samples were tested monthly and positivity rate on the  
301 Euroimmun assay was determined on a weekly basis, to identify the population-level  
302 spread of COVID-19 and inform government decision-making. Data was reported to  
303 the Public Health England seroepidemiology steering group, scientific pandemic  
304 influenza group on modelling (SPI-M) and DHSC, as well as published in the weekly  
305 PHE COVID-19 report<sup>5</sup>. This data helped to determine and understand the scale of  
306 asymptomatic spread of COVID-19 within the UK population, allowing PHE, DHSC  
307 and modellers to assess age groups and areas that are driving transmission.

308 In addition to the NHSBT serosurveillance, blood samples were obtained from patients  
309 visiting primary care settings via the Royal College of General Practitioners (RCGP)  
310 Research and Surveillance Centre to determine COVID-19 seroprevalence, with a  
311 total of 24,927 samples tested since March 2020.

312 As part of a collaboration between PHE and NHSBT, convalescent plasma donor  
313 samples were tested to determine which donations should be provided for clinical trials  
314 assessing the therapeutic effects of convalescent plasma treatment of patients with  
315 COVID-19 (NHSBT Conv). The Euroimmun assay was chosen as the results showed  
316 a good correlation with neutralisation assays<sup>7,8</sup>; and donations with a Euroimmun  
317 serology index result of >9.1 (later revised to 6.0) were shown to be associated with  
318 the presence of high neutralising antibody titres of 1:100 or higher<sup>7,8</sup> and were hence  
319 selected for trial use. Serological testing in support of this project began in April 2020,  
320 with the first patients receiving treatment in the beginning of May as part of the  
321 REMAP-CAP trial<sup>10</sup> and subsequently via the RECOVERY trial<sup>9</sup>.

322 Whilst laboratory antibody testing using ELISAs is considered the gold-standard for  
323 determining population-level exposure to SARS-CoV-2, additional studies were  
324 conducted to determine the feasibility of using lateral flow device antibody tests. On  
325 request from DHSC, a study was performed on emergency service workers to evaluate  
326 the utility of home antibody testing kits; EDSAB-HOME (Evaluating Detection of  
327 SARS-CoV-2 AntiBodies at HOME). Capillary blood samples from >2,500 volunteers  
328 were tested on different lateral flow devices and a contemporaneous venous sample  
329 was tested on the Euroimmun assay as the reference test<sup>18</sup>.

330 From the start of the first COVID-19 lockdown in the UK (23 March 2020), the  
331 COVIDsortium study (NCT04318314) collected serial samples from a cohort of 731  
332 healthcare workers (HCW) with the aim of identifying host and pathogen correlates of  
333 protection and pathogenesis in mild/asymptomatic SARS-CoV-2 infection<sup>19,20</sup>. The  
334 Euroimmun assay was used throughout to characterise the serostatus of all study  
335 samples which by completion of the final follow-up samples at 1 year, will number  
336 more than 13,000 samples. This data helped to define the proportion of this HCW  
337 cohort who seroconverted, and was used to monitor the longitudinal antibody  
338 response and rate of decline of anti-S1 IgG antibodies<sup>6</sup> and to investigate the  
339 relationship between peak anti-S1 IgG titre and neutralising antibody titre<sup>21</sup>.

340 In addition, a small project (ESCAPE) began in March 2020 as a mechanism to study  
341 antibody responses to infection. A cohort of Public Health England staff across 4 sites  
342 were recruited, with monthly blood donations taken as a way to understand the kinetics  
343 of antibodies post-infection<sup>11</sup>.

344 A collaboration between PHE and Hampshire Hospitals NHS Foundation Trust  
345 (HHFT), provided 1885 serial samples from 282 hospital in-patients with acute COVID-

346 19 and 189 serial samples from 50 convalescent HCWs (the PDASH study). All  
347 participants had PCR confirmed SARS-CoV-2 infections that ranged from  
348 asymptomatic to severe disease. The study used the Euroimmun assay to determine  
349 the time to seroconversion and to monitor the longitudinal antibody response in study  
350 participants.

351 Other projects included those used specifically for serology assay evaluations  
352 conducted by PHE Porton and PHE SEU, smaller research studies, and those  
353 conducted by hospitals and colleagues early in the pandemic.

354

## 355 8. Discussion

356 The Euroimmun assay has been fundamental to the UK's public health response to  
357 COVID-19, with >160,000 samples tested March 2020 to March 2021 (**Figure 6**). This  
358 early availability of the assay was key to performing seroprevalence testing in the early  
359 stages of the pandemic, informing the policy and legislative responses of PHE, DHSC  
360 and the UK Government. It also contributed to our understanding of immune  
361 responses during COVID-19 infection and recovery as well as provided real-time (~24  
362 hours) testing of convalescent plasma before being provided for use in clinical trials.

363 Whilst many platforms and assays now exist for the detection of anti-SARS-CoV-2  
364 antibodies (including those evaluated by ourselves<sup>22</sup>), there were limited choices  
365 available at the onset of the pandemic in the UK in March 2020. This highlights the  
366 need and basis for pandemic preparedness from an immunology and serology  
367 perspective, with the requirement for labs to be able to run high-throughput antibody  
368 tests on specimens from patients infected with newly emerging pathogens. Rapid  
369 immunology research on a new pathogen enables early understanding of potential  
370 immunity and inform early vaccine design. Whilst in-house/research-based assays  
371 were available since January 2020, these require significant quality control to ensure  
372 consistent diagnosis across batches of samples to ensure consistent sensitivity.  
373 Similarly, in-house assays can also suffer from logistical and supply issues for  
374 specially manufactured components (recombinant proteins etc). Commercial assays  
375 became rapidly available with the spread of SARS-CoV-2 in early 2020, however  
376 supply and logistical issues were also evident with the global spread of SARS-CoV-2,  
377 so this should be a factor in deciding on assays for serosurveillance.

378



379 In our original evaluation, we found an overall sensitivity of 72.0% (interval  $\geq 14$  days:  
380 73.42%, interval  $\geq 21$  days: 74.67%) and a specificity of 99.0% for the Euroimmun  
381 assay, whilst the extended evaluation detailed here found an overall sensitivity of  
382 91.39% (interval  $\geq 14$  days: 92.74%, interval  $\geq 21$  days: 93.59%) and a specificity of  
383 98.56% (**Table 1, Figure 2**). This data is supported by other studies, which have  
384 shown similar high sensitivities of 90%<sup>23</sup>, 96%<sup>24</sup> and 100%<sup>25</sup>. The initial evaluation  
385 suggested a moderate sensitivity for the Euroimmun assay, but this is likely a reflection  
386 of the early stages of the pandemic, when serum from patients with confirmed COVID-  
387 19 were extremely difficult to obtain, disease onset was poorly characterised and little  
388 convalescent material was available. This limited the number of samples, as many of  
389 the original evaluation samples were obtained from patients with mild disease within  
390 the community, so in using these particular samples, this could have resulted in lower  
391 sensitivity than anticipated, due to mild infections and resulting in lower antibody  
392 responses than those with severe infections or those requiring hospitalisation<sup>26</sup>. In  
393 addition, timing between disease onset and sample date was not fully established for  
394 all patient samples, with many taken from patients too early since disease onset,  
395 whereby no robust IgG/immunological response is mounted.

396 Use of an extended sample panel has enabled us to better evaluate the Euroimmun  
397 assay. Although the Euroimmun assay showed improved sensitivity in our extended  
398 evaluation, in our analysis, it still does not meet the MHRA's Target Product Profile  
399 (TPP) of >98% sensitivity recommendation for SARS-CoV-2 serology assays to  
400 determine if people have recent infection of SARS-CoV-2<sup>27</sup>; it does however meet the  
401 TPP of >98% specificity.

402 In addition to improved sensitivity using this extended panel, intra- and inter-assay  
403 variation was found to be low, with covariance of <7% and <5%, respectively. Using

404 pooled patient samples and the NIBSC diagnostic calibrant, the linear range of the  
405 assay was also determined, enabling semi-quantitative comparisons (**Figure 4**). Our  
406 results are consistent with other studies that show that only a defined range of the  
407 Euroimmun assay can be used to reliably infer a linear range<sup>6</sup>.

408 As an anti-spike (S1 domain) antibody ELISA, the Euroimmun assay results also  
409 correlate with neutralising antibody titres ( $R=0.83$ ,  $R^2=0.69$ ) as shown elsewhere<sup>7,8,28</sup>,  
410 suggesting that this assay provides a useful surrogate for virus neutralisation and  
411 possible correlation to immune protection (**Figure 5**), without the requirement for  
412 containment level 3 facilities and live-virus culture. However, other pseudo-type  
413 assays have shown higher correlation<sup>28</sup>, likely due to the different dynamics between  
414 antibody-binding assays and neutralisation-based assays.

415 In addition, as an indirect sandwich ELISA, results are only semi-quantitative and  
416 display a maximum reading for optical densities due to reader saturation. In our  
417 equipment implementation depending on the calibrator value, max OD values can then  
418 result in an index value of between approximately 26 and 38, preventing direct  
419 comparisons between samples unless the calibrator values are similar or are within  
420 the linear range of the assay, determined here to be between OD values of 1 and 9,  
421 (**Figure 4**). If quantitative results are desired, our recommendation is to dilute samples  
422 that are strongly positive to within this range.

423 Notably, of the serology assays evaluated by PHE Porton Down to date<sup>22</sup>, the  
424 Euroimmun assay format does not require the installation of dedicated  
425 machinery/specialist equipment, similar to other plate-based ELISA assays. This  
426 enables wider use of the assay: it can be utilised in most laboratory settings using  
427 automated pipetting platforms (such as the Stratec Gemini), or on the bench with

428 manual pipetting, or within the field since only limited additional laboratory equipment  
429 such as a plate reader is required.

430 Serology assay selection for different requirements is complex<sup>29</sup>. This initial  
431 programme was principally focused on serosurveillance, further work is now underway  
432 at PHE Porton to determine antibody responses induced by vaccination<sup>30</sup>, vaccine  
433 effectiveness<sup>31</sup>, vaccine coverage, variant infection and population spread<sup>32</sup>, using a  
434 combination of serology assays targeting different antigens. With additional assays  
435 now available, we have expanded our assays to encompass those with improved  
436 sensitivity and specificity, with the capability to change rapidly, enabling better and  
437 more accurate analysis of the differing and refined responses to the SARS-CoV-2.  
438 Newer assays have enabled us to determine specific protein sub-domain responses  
439 (e.g. anti-RBD), as well as using a combination of assays as a mechanism to  
440 differentiate between those with previous infection (presence of both anti-spike and  
441 anti-nucleocapsid antibodies), those with vaccination and no previous infection  
442 (presence of only anti-spike antibodies) and those with previous infection and  
443 vaccination (presence of both anti-spike and anti-nucleocapsid antibodies, with  
444 significantly higher anti-spike responses as reported elsewhere<sup>30</sup>).

## 445 9. Acknowledgements and funding

446 We thank the many scientists and clinicians that provided PHE Porton with early  
447 samples from those with PCR-confirmed SARS-CoV-2 infection in March 2020,  
448 including those at Guy's and St Thomas' Hospital, Westminster, Royal Free Hospital,  
449 Barnet and North Hampshire County Hospital, Basingstoke. In addition, we thank  
450 collaborators from the head-to-head study at Oxford University (Gillian Rodger,  
451 Hayleah Pickford, Teresa Street, Kate Dingle, Justine Rudkin, Derrick Crook, David  
452 Eyre, Philippa Matthews and Nicole Stoesser).

453 This project was funded as part of the DHSC serological assay evaluation procedure.  
454 AJM and DTS are funded by ISARIC-4C "Medical Research Council (grant  
455 MC\_PC\_19059) as part of the ISARIC Coronavirus Clinical Characterisation  
456 Consortium (ISARIC-4C)", COMBAT Consortium, OUH clinical and research staff and  
457 patients

## 458 10. Author contributions

459 ADO and AB wrote the manuscript. AB, DB, ADO, SD'A, TB, AS, MC, PP, AS and RV  
460 performed and oversaw the initial evaluation and assay implementation. ADO, AB and  
461 SD'A performed the extended assay characterisation. AB, ST, JH, CR and SD'A were  
462 responsible for routine testing. EL provided initial evaluation samples and EL & AS  
463 facilitated with sourcing samples. AJM and DTS provided additional evaluation  
464 samples. AL, HH and MZ were responsible for the microneutralisation work. All  
465 authors read and commented on the final manuscript.

466

467

468        11.        References

- 469        1.        World Health Organization. COVID-19 Weekly Epidemiological Update 22.  
470                *World Heal. Organ.* 1–3 (2021).
- 471        2.        Lillie, P. J. *et al.* Novel coronavirus disease (Covid-19): The first two patients in  
472                the UK with person to person transmission. *Journal of Infection* **80**, 578–606  
473                (2020).
- 474        3.        Chappell, J. G. *et al.* Retrospective screening of routine respiratory samples  
475                revealed undetected community transmission and missed intervention  
476                opportunities for SARS-CoV-2 in the United Kingdom. *medRxiv*  
477                2020.08.18.20174623 (2020). doi:10.1101/2020.08.18.20174623
- 478        4.        Public Health England. *National COVID-19 surveillance reports.* (2020).
- 479        5.        Public Health England. *Public Health England National flu and COVID-19*  
480                *surveillance reports.*
- 481        6.        Manisty, C. *et al.* Time series analysis and mechanistic modelling of  
482                heterogeneity and sero-reversion in antibody responses to mild SARS-CoV-2  
483                infection. *EBioMedicine* **65**, 103259 (2021).
- 484        7.        Harvala, H. *et al.* Convalescent plasma therapy for the treatment of patients with  
485                COVID-19: Assessment of methods available for antibody detection and their  
486                correlation with neutralising antibody levels. *Transfus. Med.* 1–9 (2020).  
487                doi:10.1111/tme.12746
- 488        8.        Harvala, H. *et al.* Convalescent plasma treatment for SARS-CoV-2 infection:  
489                analysis of the first 436 donors in England, 22 April to 12 May 2020.  
490                *Eurosurveillance* **25**, 2001260 (2020).

- 491 9. RECOVERY Collaborative Group. Convalescent plasma in patients admitted to  
492 hospital with COVID-19 (RECOVERY): a randomised controlled, open-label,  
493 platform trial. *Lancet* (2021). doi:10.1016/S0140-6736(21)00897-7
- 494 10. REMAP-CAP Investigators, Estcourt, L. J. Convalescent Plasma in Critically ill  
495 Patients with Covid-19. *medRxiv* 2021.06.11.21258760 (2021).
- 496 11. Harris, R. J. *et al.* Serological surveillance of SARS-CoV-2: Six-month trends  
497 and antibody response in a cohort of public health workers. *J. Infect.* 1–25  
498 (2021). doi:10.1016/j.jinf.2021.03.015
- 499 12. Amirthalingam, G. *et al.* Seroprevalence of SARS-CoV-2 among Blood Donors  
500 and Changes after Introduction of Public Health and Social Measures, London,  
501 UK. *Emerg. Infect. Dis.* **27**, 1795–1801 (2021).
- 502 13. Ainsworth, M. *et al.* Performance characteristics of five immunoassays for  
503 SARS-CoV-2: a head-to-head benchmark comparison. *Lancet Infect. Dis.* **20**,  
504 1390–1400 (2020).
- 505 14. Boddington, N. L. *et al.* COVID-19 in Great Britain: Epidemiological and clinical  
506 characteristics of the first few hundred (FF100) cases: A descriptive case series  
507 and case control analysis. *medRxiv* (2020). doi:10.1101/2020.05.18.20086157
- 508 15. Public Health England. *Supporting information for the PHE commercial serology*  
509 *assay evaluations.*
- 510 16. Public Health England. *Evaluation of the Euroimmun Anti-SARS-CoV-2 ELISA*  
511 *(IgG) serology assay for the detection of anti-SARS-CoV-2 antibodies.* (2020).
- 512 17. Public Health England. *Evaluation of sensitivity and specificity of four*  
513 *commercially available SARS-CoV-2 antibody immunoassays.* (2020).

- 514 18. Mulchandani, R. *et al.* Accuracy of UK Rapid Test Consortium (UK-RTC) ‘abC-  
515 19 Rapid Test’ for detection of previous SARS-CoV-2 infection in key workers:  
516 Test accuracy study. *BMJ* **371**, (2020).
- 517 19. Moon, J. C. *et al.* Healthcare Workers Bioresource: Study outline and baseline  
518 characteristics of a prospective healthcare worker cohort to study immune  
519 protection and pathogenesis in COVID-19. *Wellcome Open Res.* **5**, (2020).
- 520 20. Treibel, T. A. *et al.* COVID-19: PCR screening of asymptomatic health-care  
521 workers at London hospital. *The Lancet* **395**, 1608–1610 (2020).
- 522 21. Reynolds, C. J. *et al.* Discordant neutralizing antibody and T cell responses in  
523 asymptomatic and mild SARS-CoV-2 infection. *Sci. Immunol.* **5**, (2020).
- 524 22. Public Health England. COVID-19: laboratory evaluations of serological assays.  
525 *GOV.UK* (2021). Available at:  
526 [https://www.gov.uk/government/publications/covid-19-laboratory-evaluations-](https://www.gov.uk/government/publications/covid-19-laboratory-evaluations-of-serological-assays)  
527 [of-serological-assays.](https://www.gov.uk/government/publications/covid-19-laboratory-evaluations-of-serological-assays) (Accessed: 2nd June 2021)
- 528 23. Lassaunière, R. *et al.* Evaluation of nine commercial SARS-CoV-2  
529 immunoassays. *medRxiv* 2020.04.09.20056325 (2020).  
530 doi:10.1101/2020.04.09.20056325
- 531 24. GeurtsvanKessel, C. H. *et al.* An evaluation of COVID-19 serological assays  
532 informs future diagnostics and exposure assessment. *Nat. Commun.* **11**, (2020).
- 533 25. Manalac, J. *et al.* Evaluation of Abbott anti-SARS-CoV-2 CMIA IgG and  
534 Euroimmun ELISA IgG/IgA assays in a clinical lab. *Clin. Chim. Acta* **510**, 687–  
535 690 (2020).
- 536 26. Rijkers, G. *et al.* Differences in antibody kinetics and functionality between

- 537 severe and mild severe acute respiratory syndrome Coronavirus 2 infections. *J.*  
538 *Infect. Dis.* **222**, 1265–1269 (2020).
- 539 27. MHRA. Target Product Profile: antibody tests to help determine if people have  
540 recent infection to SARS-CoV-2: Version 2. Available at:  
541 [https://www.gov.uk/government/publications/how-tests-and-testing-kits-for-](https://www.gov.uk/government/publications/how-tests-and-testing-kits-for-coronavirus-covid-19-work/target-product-profile-antibody-tests-to-help-determine-if-people-have-recent-infection-to-sars-cov-2-version-2)  
542 [coronavirus-covid-19-work/target-product-profile-antibody-tests-to-help-](https://www.gov.uk/government/publications/how-tests-and-testing-kits-for-coronavirus-covid-19-work/target-product-profile-antibody-tests-to-help-determine-if-people-have-recent-infection-to-sars-cov-2-version-2)  
543 [determine-if-people-have-recent-infection-to-sars-cov-2-version-2](https://www.gov.uk/government/publications/how-tests-and-testing-kits-for-coronavirus-covid-19-work/target-product-profile-antibody-tests-to-help-determine-if-people-have-recent-infection-to-sars-cov-2-version-2). (Accessed:  
544 8th April 2021)
- 545 28. Lamikanra, A. *et al.* Comparability of six different immunoassays measuring  
546 SARS-CoV-2 antibodies with neutralizing antibody levels in convalescent  
547 plasma: From utility to prediction. *Transfusion* **61**, 2837–2843 (2021).
- 548 29. Peeling, R. W. *et al.* Serology testing in the COVID-19 pandemic response.  
549 *Lancet Infect. Dis.* **20**, e245–e249 (2020).
- 550 30. Manisty, C. *et al.* Antibody response to first BNT162b2 dose in previously SARS-  
551 CoV-2-infected individuals. *Lancet* (2021). doi:10.1016/S0140-6736(21)00501-  
552 8
- 553 31. Hall, V. J. *et al.* COVID-19 vaccine coverage in health-care workers in England  
554 and effectiveness of BNT162b2 mRNA vaccine against infection (SIREN): a  
555 prospective, multicentre, cohort study. *Lancet (London, England)* 1725–1735  
556 (2021). doi:10.1016/S0140-6736(21)00790-X
- 557 32. Whitaker, H. *et al.* Impact of COVID-19 Vaccination Program on Seroprevalence  
558 in Blood Donors in England, 2021. *J. Infect.* (2021).  
559 doi:10.1016/j.jinf.2021.04.037



560

561

562

563 **Table S1:** Precision results for the Euroimmun assay using five pooled patient sera.

564 Samples were tested in replicates of five over five days. Intra-assay variation was

565 <7%, whilst inter-assay variation was <5%

| Sample |      | Day 1 | Day 2 | Day 3 | Day 4 | Day 5 | Inter-assay Mean | Inter-assay SD | Inter-assay CV |
|--------|------|-------|-------|-------|-------|-------|------------------|----------------|----------------|
| 1      | Mean | 9.00  | 8.43  | 8.59  | 8.43  | 8.64  | 8.62             | 0.235          | 2.724          |
|        | SD   | 0.26  | 0.13  | 0.14  | 0.08  | 0.13  |                  |                |                |
|        | CV   | 2.93  | 1.59  | 1.60  | 0.99  | 1.50  |                  |                |                |
| 2      | Mean | 6.28  | 5.95  | 5.99  | 6.04  | 6.12  | 6.08             | 0.132          | 2.180          |
|        | SD   | 0.11  | 0.19  | 0.13  | 0.16  | 0.28  |                  |                |                |
|        | CV   | 1.69  | 3.26  | 2.18  | 2.64  | 4.50  |                  |                |                |
| 3      | Mean | 3.72  | 3.52  | 3.55  | 3.67  | 3.67  | 3.62             | 0.087          | 2.409          |
|        | SD   | 0.11  | 0.12  | 0.04  | 0.19  | 0.11  |                  |                |                |
|        | CV   | 2.84  | 3.52  | 1.13  | 5.17  | 2.93  |                  |                |                |
| 4      | Mean | 2.07  | 1.90  | 1.99  | 1.99  | 1.99  | 1.99             | 0.062          | 3.102          |
|        | SD   | 0.04  | 0.03  | 0.06  | 0.09  | 0.08  |                  |                |                |
|        | CV   | 2.16  | 1.72  | 3.12  | 4.42  | 4.04  |                  |                |                |
| 5      | Mean | 1.07  | 0.98  | 1.02  | 0.99  | 1.03  | 1.02             | 0.037          | 3.620          |
|        | SD   | 0.07  | 0.01  | 0.04  | 0.02  | 0.07  |                  |                |                |
|        | CV   | 6.28  | 0.55  | 3.76  | 2.46  | 6.60  |                  |                |                |

566

567

568 **Table S2: Determination of linear range of EuroImmun assay using serially**  
569 **diluted pooled patient sera.** Pooled serum samples at dilutions of 2, 4 and 8 were  
570 removed due to OD saturation.

| Source       | Dilution  | Index (mean) | SD    |       |
|--------------|-----------|--------------|-------|-------|
| Patient pool | 16        | 8.617        | 0.235 |       |
|              | 32        | 6.077        | 0.132 |       |
|              | 64        | 3.624        | 0.087 |       |
|              | 128       | 1.987        | 0.062 |       |
|              | 256       | 1.018        | 0.037 |       |
|              | Calibrant | 5            | 7.636 | 0.793 |
| 10           |           | 6.000        | 0.279 |       |
| 20           |           | 3.673        | 0.261 |       |
| 50           |           | 1.820        | 0.100 |       |
| 100          |           | 1.029        | 0.045 |       |
| 200          |           | 0.614        | 0.013 |       |

571

572

573 12. Appendix 1

574 **PHE Porton Euroimmun testing group** list of authors:

575 Joanna Bacon, Daniel Bailey, Natalie Baker, Jack Bleach, Debbie Blick, Paul Bolton,  
576 Abbie Bown, Olivia Carr, Matthew Catton, Melanie Clifford, Tom Coleman, Charlie  
577 Cooper, Charlotte Cornbill, Ellie Cross, Mollie Curran-French, Silvia D’Arcangelo,  
578 Owen Daykin-Pont, Charlotte Dixon, Phoebe Do Carmo Silva, Ellie Drinkwater, Jackie  
579 Duggan, Xena Dyball, Jack Easton, Ruth Elderfield, Anaya Ellis, Jenna Furneaux,  
580 Harriet Garland, Barry Gibney, Supriya Gurung, Rachel Halkerston, Robin Hanson,  
581 James Hardy, Alexander Hargreaves, Gabrielle Harker, Becky Harrison, Bethany  
582 Hicks, Charlotte Hind, Emma Hobbs, James Hogg, Margarita Jablonska, Leah Johal,  
583 Caoimhe Kelly, Carensa Knights, Emily Laing, Deborah Lister, Rosa Loffredo, Adam  
584 Mabbutt, Bethany Martin, Felicity Marx, Lara Mason, Joanna McGlashan, Debbie  
585 McKee, Isobel Miles, Sebastian Millward, Gloria Mongelli, Christopher Moon, Taalia  
586 Morgan, Alexandra Morrison, Alexandra Morrison, Anna Moy, Josh Nelthorpe-Cowne,  
587 Jack Nevols, Jane Osbourne, Jodie Owen, Ros Packer, Jordan Pascoe, Prem  
588 Perumal, Esther Picton-Barlow, Eleanor Porges, Saskia Proud, Deen Qureshi,  
589 Anastasia Richardson, April Roberts, Adam Roberts, Amanda Semper, Lauren  
590 Setterfield, Jennifer Small, Kirstie Speer, Sara Speight, Angela Sweed, Stephen  
591 Taylor, Steve Thomas, Sian Tiley, Elizabeth Truelove, Ann Varghese, Richard Vipond,  
592 Rosie Watts, Katie West, Clare Wilson, Kate Withycombe, Charlotte Woolley.
